# Supplementary material for: Cytoplasmic p53β Isoforms Are Associated with Worse Disease-Free Survival in Breast Cancer
Source: MDPI journal article supplement (doi:10.3390/ijms23126670), 2022-06-15
Supplement: s1 [file s1]

## Supplementary

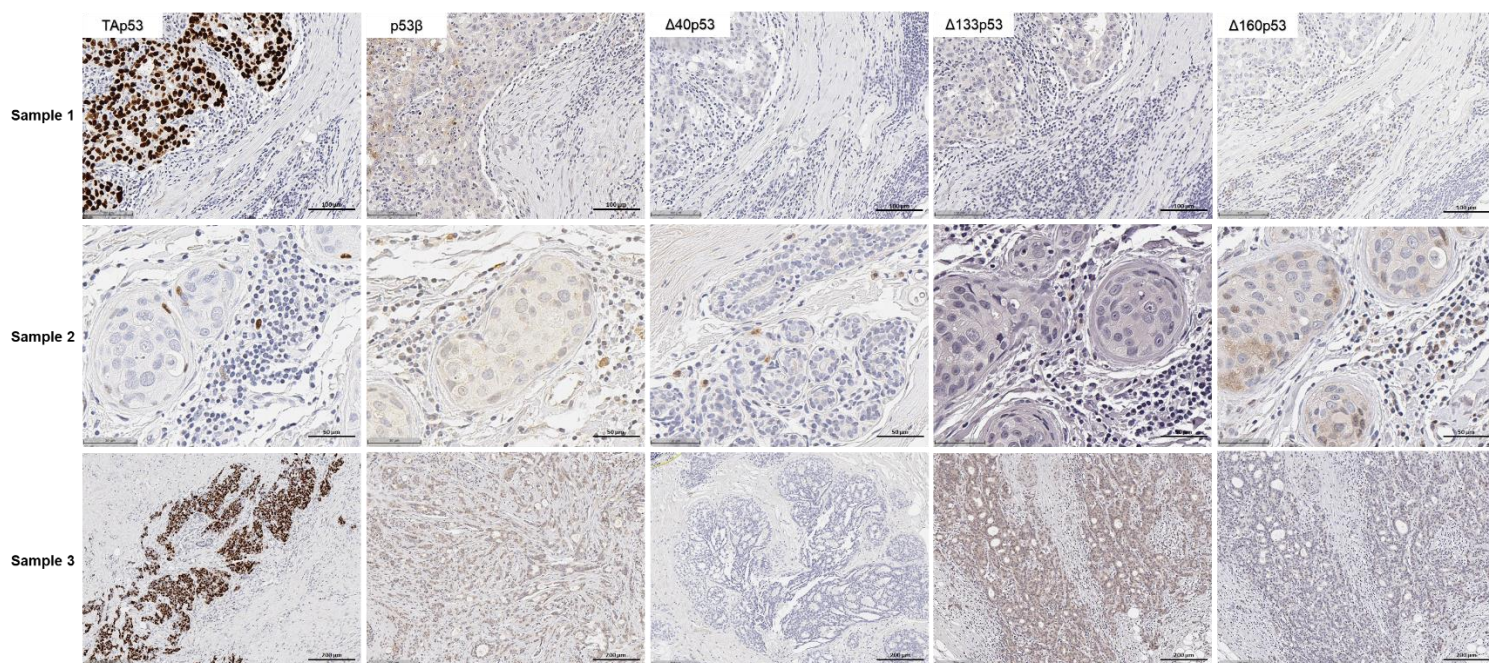

**Supplementary Figure S1:** Representative images of the three specimens stained for TAp53 (DO-1), p53 $\beta$  (KJC8),  $\Delta$ 40p53 (KJC40),  $\Delta$ 133p53 (KJC133), or  $\Delta$ 160p53 (KJC160). Scale bar represents 100  $\mu$ m (sample 1), 50  $\mu$ m (sample 2), and 200  $\mu$ m (sample 3).

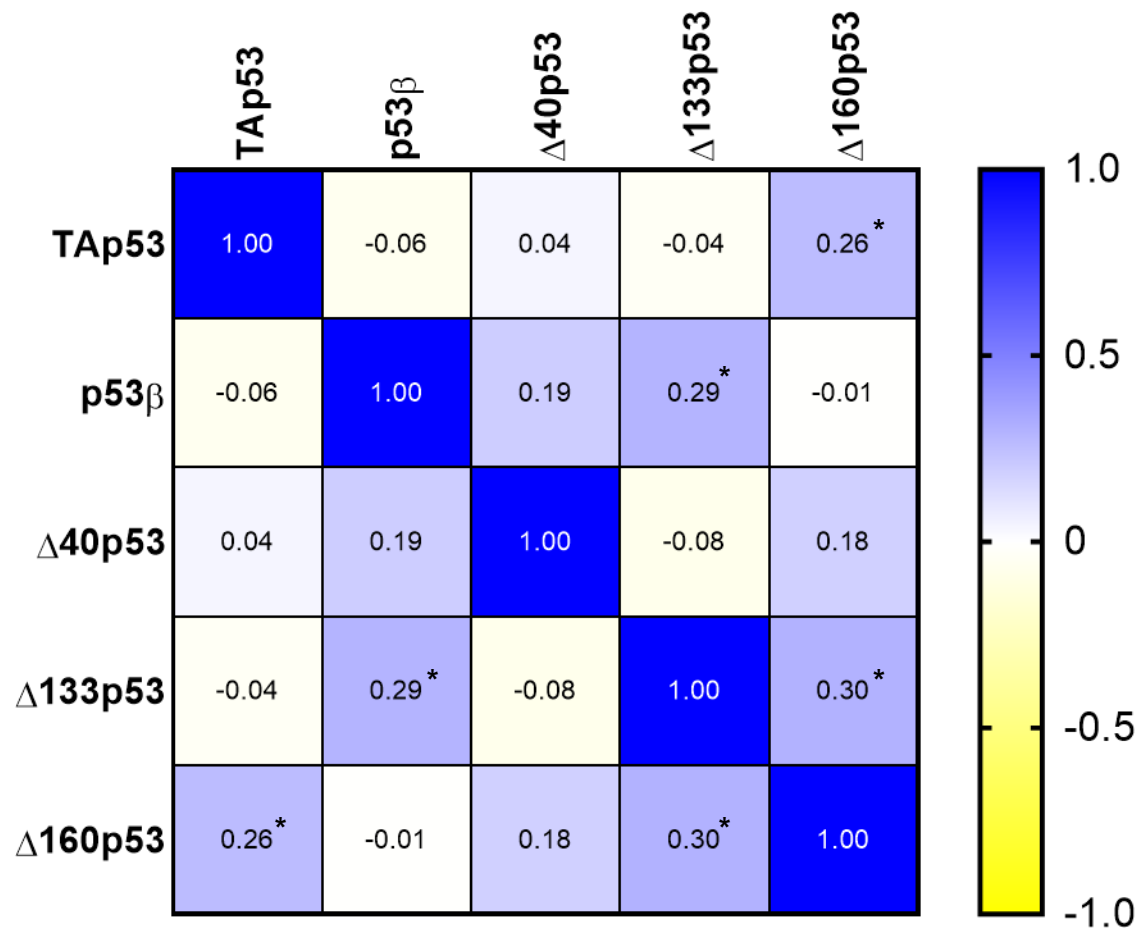

**Supplementary Figure S2:** Correlation of p53 isoform expression with one another. Correlation analyses were performed using the Spearman rank correlation coefficient to evaluate the relationship between individual p53 isoform expression in 108 breast cancer specimens. p53 $\beta$ , and  $\Delta$ 133p53, and  $\Delta$ 133p53 and  $\Delta$ 160p53 were found to be significantly correlated with one another. Results were considered significant at  $p < 0.05$  (\*).

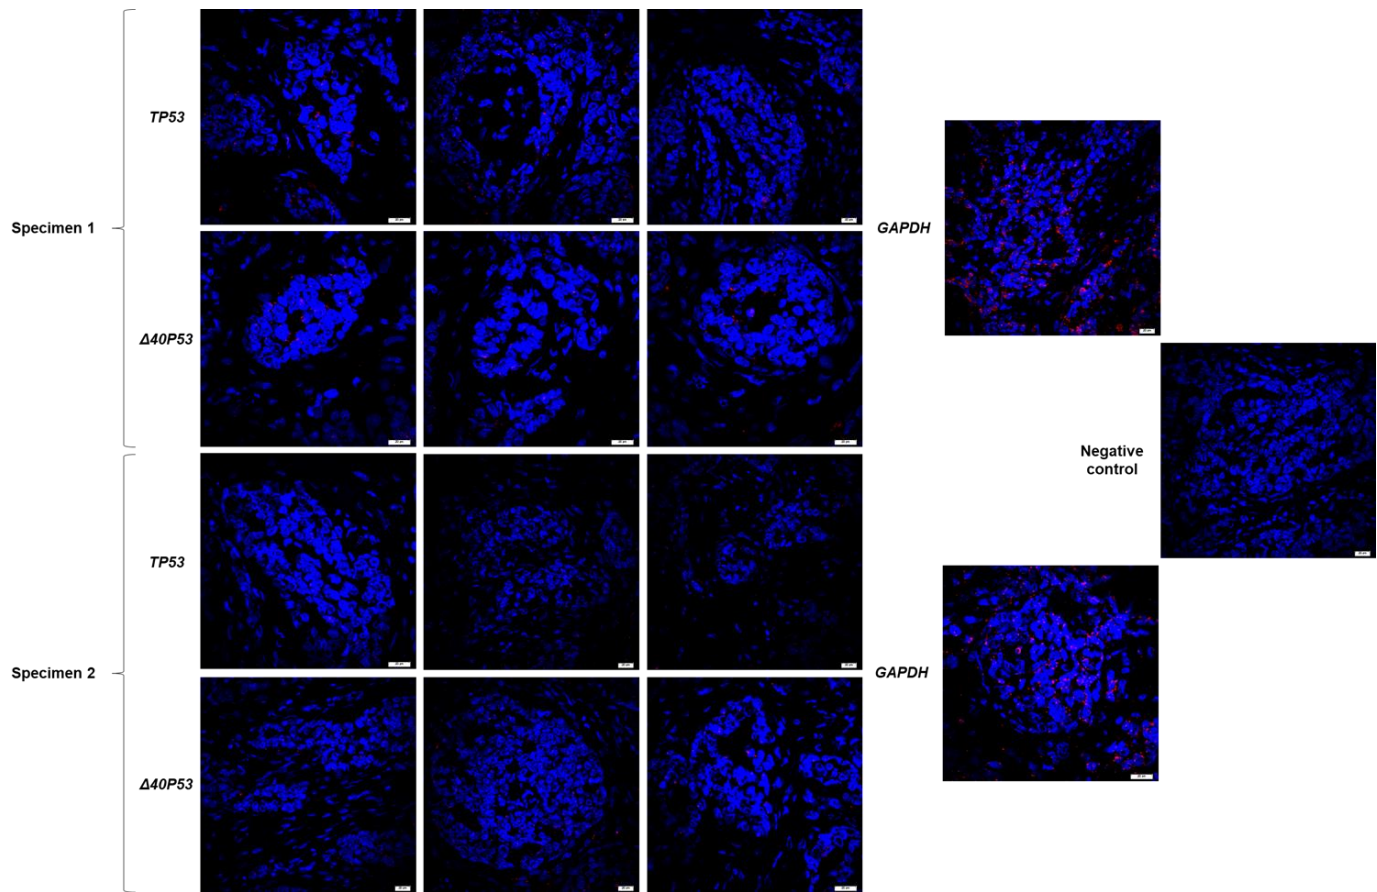

**Supplementary Figure S3:** *In situ* hybridisation of two TNBC specimens for  $\Delta 40p53$  or *TP53* (shown in red). *GAPDH* was used as a positive control. Cells nuclei were stained with DAPI. Scale bar represents 20  $\mu\text{m}$ .

**Supplementary Table S1:** Association of p53 isoform expression and clinicopathological features.

| Isoform         | Clinicopathological features | Nuclear staining<br><i>p</i> value | Cytoplasmic staining<br><i>p</i> value |
|-----------------|------------------------------|------------------------------------|----------------------------------------|
| TAp53           | Age                          | 0.2254                             | 0.6241                                 |
|                 | Grade                        | 0.9247                             | 0.9312                                 |
|                 | Tumour size                  | 0.9918                             | <b>0.0329</b>                          |
|                 | LN+                          | 0.3945                             | 0.9620                                 |
|                 | ER+                          | 0.1404                             | 0.1047                                 |
|                 | PR+                          | 0.3810                             | 0.4354                                 |
|                 | HER2+                        | 0.0522                             | 0.3170                                 |
|                 | <i>TP53</i> mut              | <b>0.0022</b>                      | 0.0963                                 |
| p53 $\beta$     | Age                          | 0.4676                             | 0.6803                                 |
|                 | Grade                        | 0.0995                             | 0.9759                                 |
|                 | Tumour size                  | 0.2898                             | <b>0.2787</b>                          |
|                 | LN+                          | 0.4302                             | 0.3778                                 |
|                 | ER+                          | 0.3623                             | 0.3609                                 |
|                 | PR+                          | 0.7746                             | 0.9952                                 |
|                 | HER2+                        | 0.6843                             | 0.6124                                 |
|                 | <i>TP53</i> mut              | 0.3326                             | 0.639                                  |
| $\Delta$ 133p53 | Age                          | 0.437                              | 0.7112                                 |
|                 | Grade                        | 0.7186                             | 0.8194                                 |
|                 | Tumour size                  | 0.6717                             | 0.3409                                 |
|                 | LN+                          | 0.8604                             | 0.8893                                 |
|                 | ER+                          | 0.3144                             | <b>0.2218</b>                          |
|                 | PR+                          | 0.3627                             | 0.3743                                 |
|                 | HER2+                        | 0.7816                             | 0.2178                                 |
|                 | <i>TP53</i> mut              | 0.7462                             | 0.3182                                 |
| $\Delta$ 160p53 | Age                          | 0.4358                             | 0.0995                                 |
|                 | Grade                        | 0.1831                             | 0.0835                                 |
|                 | Tumour size                  | 0.2862                             | 0.5424                                 |
|                 | LN+                          | 0.2235                             | <b>0.2082</b>                          |
|                 | ER+                          | 0.1995                             | 0.3808                                 |
|                 | PR+                          | 0.3203                             | 0.3274                                 |
|                 | HER2+                        | 0.5023                             | 0.5694                                 |
|                 | <i>TP53</i> mut              | 0.9489                             | 0.1763                                 |

Multiple linear regression was used to determine statistical significance. Results were considered significant at  $p < 0.05$ . LN: lymph nodes; ER: oestrogen-receptor; PR: progesterone receptor; HER2: human epidermal growth factor receptor 2.
